# Supplementary material for: Polygenic risk for schizophrenia converges on alternative polyadenylation as molecular mechanism underlying synaptic impairment
Source: PubMed Central journal article supplement (PMC10802452; doi:10.1101/2024.01.09.574815), 2024-01-13
Supplement: NIHPP2024.01.09.574815v2-supplement-5.pdf [file NIHPP2024.01.09.574815v2-supplement-5.pdf]

### **Supplementary Table 5. Summary of key reagents used**

Separate Excel file.

### **Supplementary Data**

#### **Supplementary Data 1. Quality control of iPSC genotype**

This data summarizes the digital karyotyping results of all iPSC lines used in this study using GSA genotyping array. For each line, a pairwise CNV analysis was conducted comparing the iPSC genotype to that of the original donor derived from a donor's blood sample. The top plot for each donor summarizes detected CNVs between iPSC and blood based genotype, where blue lines indicate a CNV. The two plots below show the CNV status in the donor sample (top) and iPSC line (bottom), where the color code indicates the type of CNV found in each sample. Separate PDF file.

#### **Supplementary Data 2. Quality control of iPSC pluripotency markers**

This data figures summarizes representative immunocytochemistry images for the key pluripotency markers OCT4, TRA1-60, NANOG, SOX2 as well as differentiation related markers PAX6, SOX1, NESTIN and KI-67 across all iPSC lines used in this study, highlighting robust pluripotency marker presence and absence of differentiation related markers. Pages 1-13, scale bar indicates 100 $\mu$ m; pages 14-24, scale bar indicates 50 $\mu$ m; pages 25 and 26, scale bar indicates 100 $\mu$ m. Separate PDF file.

### **Supplementary Data 3. Raw quantitative western blot images.**

Fully pictured digital quantitative western blot performed with WES protein simple. Western blot for each epitope was performed in 3 independent iNeuron differentiation batches from Ctrl (grey) and SCZ (blue) at day 49. Test lanes for subsequent assay optimization, e.g. concentration optimization, are not excised but marked with black bars above the respective WB lane.

Abundance of PSD95 and b3tub for normalization, is illustrated in classical WB-like lane view above the graph view with detected chemiluminescence on the y-axis and molecular weight (MW) on the x-axis, which is the base for digital quantification. Standardized ladders illustrate the molecular weight of 12, 40, 66, 116, 180, 230 kDA. Separate PDF file.
